# Supplementary material
Source: Royal Society of Chemistry journal article supplement (doi:10.1039/d6tb00003g)
Supplement: d6tb00003g1.pdf [file d6tb00003g1.pdf]

## **GalNAc-Modified Five-Component Lipid Nanoparticles for Liver-Targeted Delivery of p65 siRNA to Alleviate Cytokine Storm in Liver Injury via NF- $\kappa$ B Targeting**

Zhijie Liang<sup>1,2#</sup> Shaorong Li<sup>1#</sup> Huali Huang<sup>1</sup> Shuying Luo<sup>1</sup> Hongmian Jiang<sup>1</sup> Lifeng Luo<sup>1</sup> Jinzhuai Li<sup>3\*</sup> Kun Zhao<sup>4\*</sup>

*1 The Fifth Affiliated Hospital of Guangxi Medical University, Nanning 530000, China.*

*2 Research Institute of Lanzhou University in Shenzhen, Shenzhen 518000 China.*

*3 State Key Laboratory for the Chemistry and Molecular Engineering of Medicinal Resources, School of Chemistry and Pharmaceutical Sciences, Guangxi Normal University, Guilin 541004, China.*

*4 Departments of Hepatobiliary Surgery, The First Affiliated Hospital of Guangxi Medical University, Nanning 530021, China.*

#These authors contributed equally to this work.

\*Corresponding authors:

*Jinzhuai Li, Email: ljzmedicine@163.com*

*Kun Zhao, Email: kundocor@163.com*

Table 1 Physicochemical characterization of GalNAc-LNP formulations.

| Name       | Particle Size (nm) | PDI           | Zeta Potential (mV) | Encapsulation Efficiency (%) |
|------------|--------------------|---------------|---------------------|------------------------------|
| LNP-Luc    | 78.2 ± 0.39        | 0.130 ± 0.008 | 0.12 ± 0.35         | 92.18 ± 1.40                 |
| G-LNP-Luc1 | 78.9 ± 0.88        | 0.137 ± 0.012 | 0.67 ± 0.48         | 91.27 ± 0.94                 |
| G-LNP-Luc2 | 87.3 ± 0.33        | 0.146 ± 0.012 | 1.01 ± 0.70         | 90.54 ± 1.11                 |
| G-LNP-Luc3 | 87.2 ± 1.03        | 0.146 ± 0.010 | 0.03 ± 0.73         | 90.07 ± 0.92                 |
| G-LNP-Luc4 | 116.3 ± 0.82       | 0.132 ± 0.007 | 0.27 ± 1.03         | 89.20 ± 1.23                 |

Table 2 Physicochemical characterization of GalNAc-LNP formulations.

| Formulation | Particle Size (nm) | PDI           | Zeta Potential (mV) | Encapsulation Efficiency (%) |
|-------------|--------------------|---------------|---------------------|------------------------------|
| LNP-Luc     | 74.2 ± 1.9         | 0.161 ± 0.012 | 0.38 ± 0.63         | 92.46 ± 0.92                 |
| G-LNP-Luc6  | 65.1 ± 1.9         | 0.091 ± 0.039 | 0.10 ± 0.82         | 92.66 ± 1.08                 |
| G-LNP-Luc7  | 180.7 ± 4.5        | 0.192 ± 0.031 | -0.12 ± 0.59        | 91.54 ± 1.17                 |
| G-LNP-Luc8  | 68.9 ± 0.7         | 0.122 ± 0.035 | -0.25 ± 1.00        | 90.94 ± 2.03                 |
| G-LNP-Luc9  | 62.5 ± 1.0         | 0.089 ± 0.038 | -0.35 ± 0.48        | 90.27 ± 3.50                 |
| G-LNP-Luc10 | 72.3 ± 1.7         | 0.158 ± 0.040 | -0.04 ± 1.44        | 93.23 ± 2.22                 |

Table 3 Physicochemical characterization of GalNAc-LNP formulations.

| Formulation | Particle Size (nm) | PDI          | Zeta Potential (mV) | Encapsulation Efficiency (%) |
|-------------|--------------------|--------------|---------------------|------------------------------|
| LNP-siP65   | 95.86 ± 0.3        | 0.142 ± 0.01 | 0.37 ± 0.30         | 76.70 ± 0.84                 |
| G-LNP-siP65 | 90.75 ± 0.8        | 0.122 ± 0.02 | -0.78 ± 0.51        | 81.63 ± 3.27                 |

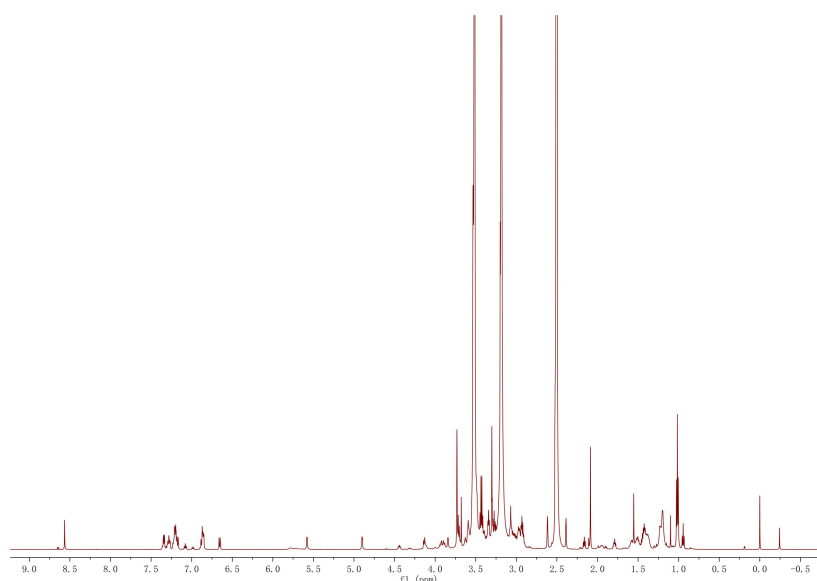Figure S1. <sup>1</sup>H NMR spectra of GalNAc-PEG-DSPE.

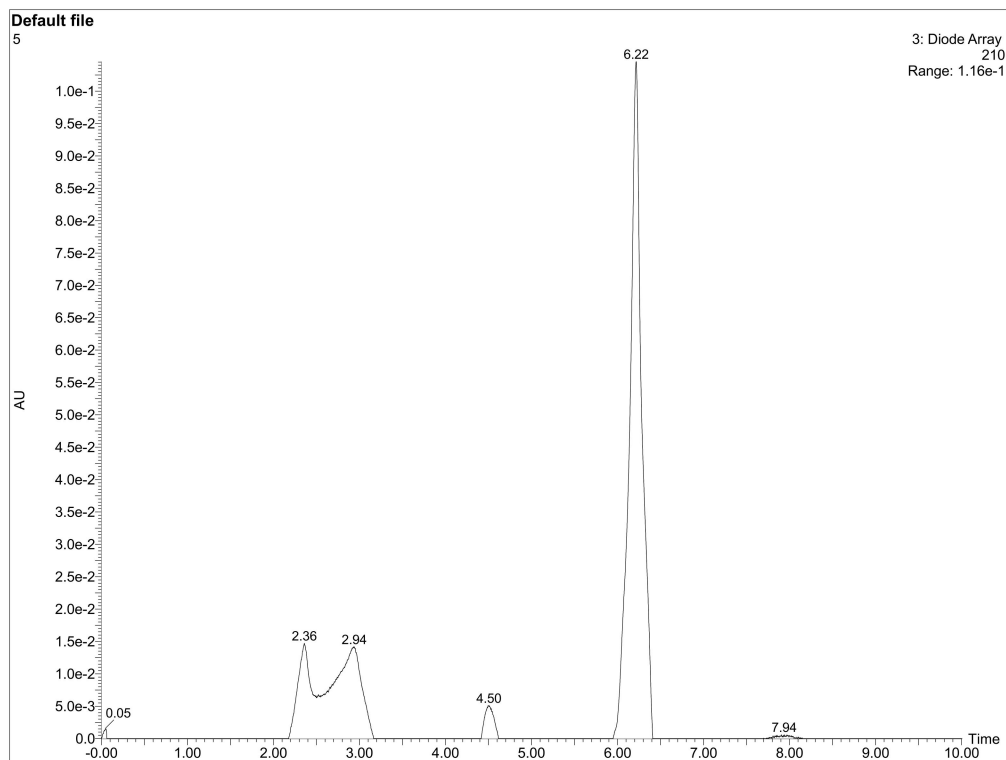

**Figure S2.** LC-DAD chromatogram of the optimized GalNAc-LNP formulation (Formulation 3) monitored at 210 nm.

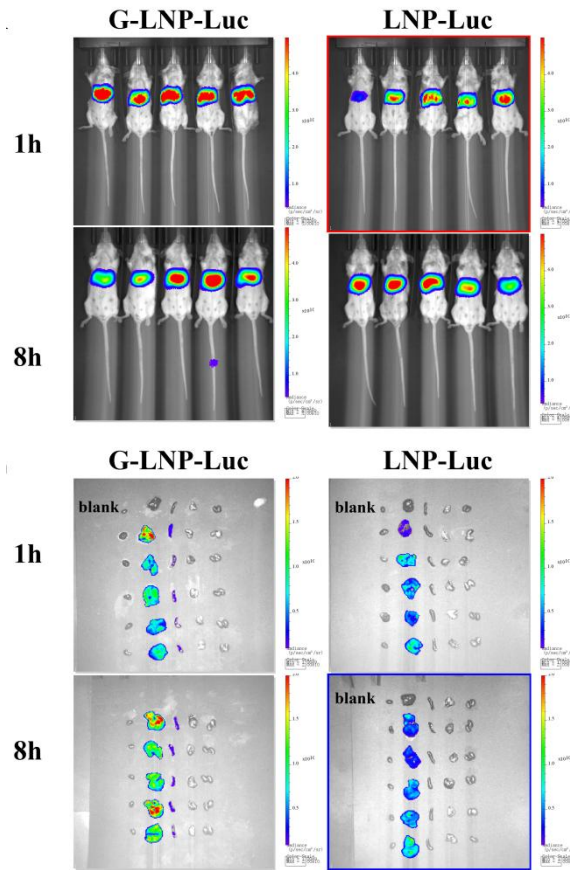

**Figure S3.** In vivo and ex vivo bioluminescence imaging of Luc-mRNA loaded LNPs. Representative whole-body bioluminescence images of mice at the indicated time points after intravenous injection of LNPs encapsulating Luc mRNA (up panel). Ex vivo bioluminescence images of major organs (liver, spleen, heart, lungs, kidneys) harvested at 1 h and 8 h post-injection (down panel).

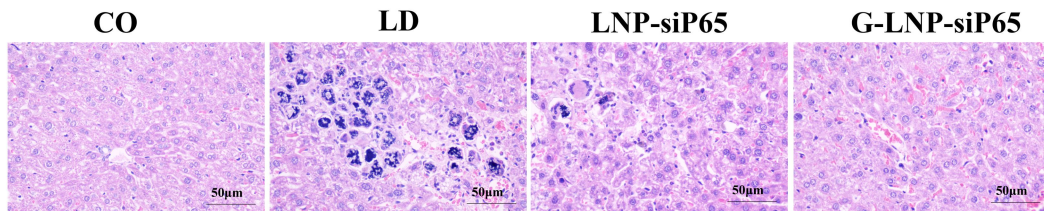

**Figure S4.** Representative H&E staining of liver sections (scale bar, 50 µm).
